# Supplementary material for: Sexual selection drives weak positive selection in protamine genes and high promoter divergence, enhancing sperm competitiveness
Source: PubMed Central journal article supplement (PMC2690471; doi:10.1098/rspb.2009.0257), 2009-04-01
Supplement: rspb20090257s18.pdf [file rspb20090257s18.pdf]

## **TABLES S1-S3**

To the article:

Sexual selection drives weak positive selection in protamine genes and high promoter divergence, enhancing sperm competitiveness.

by

Juan Martin-Coello, Hernán Dopazo, Leonardo Arbiza, Juan Ausió, Eduardo R.S. Roldan, and Montserrat Gomendio.

*Proc. R. Soc. B*

Table S1. Genes used for phylogenetic analysis. GenBank accession numbers of genes from *Mus m. bactrianus* (M ba), *Mus m. castaneus* (M ca), *Mus cookii* (M co), *Mus m. domesticus* (M do), *Mus famulus* (M fa), *Mus macedonicus* (M ma), *Mus m. musculus* (M mu), *Mus pahari* (M pa), *Mus spicilegus* (M spi), *Mus spretus* (M spr) and *Apodemus sylvaticus* (A syl), used for the phylogenetic analysis.

|                                                         | M ba     | M ca     | M co     | M do     | M fa     | M ma     | M mu     | M pa     | M spi    | M spr    | A syl    |
|---------------------------------------------------------|----------|----------|----------|----------|----------|----------|----------|----------|----------|----------|----------|
| <b>Interphotoreceptor retinoid binding protein</b>      |          | AB125807 | AB125802 |          | AJ698884 | AB125805 | AB033711 | AB096855 | AJ698882 | AB033708 | AB032863 |
| <b>Smc Y protein</b>                                    |          | AY260482 | AY260486 | AY260487 |          | AY260490 | AY260481 | AY260488 | AY260483 | AY260485 |          |
| <b>Smc Y protein</b>                                    |          | AY260494 | AY260498 | AY260499 |          | AY260503 | AY260493 | AY260500 | AY260495 | AY260497 |          |
| <b>CATSPER1</b>                                         |          | DQ021487 | DQ021498 | DQ021486 |          | DQ021496 | DQ021492 | DQ021500 | DQ021494 | DQ021493 |          |
| <b>X-linked zinc finger protein</b>                     |          | AY160025 | AY160016 | AY160021 |          | AY160013 | AY160024 |          | AY160014 | AY160015 |          |
| <b>Autosomal zinc finger protein</b>                    |          | AY160012 | AY160000 | AY160008 |          | AY160003 | AY160011 |          | AY160004 | AY160002 |          |
| <b>Y-linked zinc finger protein</b>                     |          | AAO21819 | AY159976 | AY159986 |          |          | AY159989 |          | AY159980 | AY159978 |          |
| <b>Rag 1</b>                                            |          | AB125832 | AB125828 | AB125833 |          | AB125829 | AY215075 | AB125844 | AB125835 | AB125836 | AB164041 |
| <b>Salivary androgen-binding protein alpha sub unit</b> |          | AF413619 | AF413625 | AF144714 | AF413623 | AF413622 | AF039064 |          | AF413621 | AF413620 | AF445762 |
| <b>MHC class II H2-E alpha chain precursor</b>          | U13649   |          | U89284   | U13648   |          | U89290   | U89287   |          | U89291   | U89289   |          |
| <b>GPR33</b>                                            | AY490678 | AY490628 |          | AY490635 | AY490634 | AY490627 | AY490639 |          | AY490632 | AY490631 | AY490614 |
| <b>S12</b>                                              |          | AY057792 | X85946   | AB042432 | AJ279442 | AY057794 | AY057791 | X84383   | AY057795 | AY057796 | AJ311126 |
| <b>Sry</b>                                              |          | U70657   | L29549   | L29551   |          | L29547   | U70654   | L29543   | L29550   | L29544   |          |
| <b>Cyt b</b>                                            |          | AY057805 | AY05813  | AY057807 | AJ698872 | AY057808 | AY057804 | AY057814 | AY057809 | AY057810 | AF159395 |
| <b>Tcp1</b>                                             | X61211   | X61219   | AY057822 | X61214   |          | X61213   | X61217   | AY057821 | X61216   | X61215   |          |
| <b>B2m</b>                                              | M84364   | M84366   | L05581   | M84363   |          | L05899   | AY057800 | L05579   | L05578   | M84362   |          |
| <b>Zp3-1</b>                                            |          | AY057747 | AY057755 | AY057749 |          | AY057750 | AY057746 | AY057756 | AY057751 | AY057752 |          |
| <b>Zp3-2</b>                                            |          | AY057762 | AY057770 | AY057764 |          | AY057765 | AY057761 | AY057771 | AY057766 | AY057767 |          |
| <b>Zp3-3</b>                                            |          | AY057777 | AY057785 | AY057779 |          | AY057780 | AY057776 | AY57786  | AY057781 | AY057782 |          |

Table S2. Analysis of transcription activation elements in the protamine 1 promoter. Position and nucleotide sequence of the most common enhance transcription elements in the protamine 1 promoter sequenced from 10 species of *Mus* genus.

| Element                  | Sequence       | Species                 | Position                                 |
|--------------------------|----------------|-------------------------|------------------------------------------|
| <b>TATA box</b>          | TATAAGA        | all species             | -31                                      |
| <b>Y-box</b>             | TCCTCACTGGCCAC | all species             | -105                                     |
| <b>Tet 1</b>             | TGACTTCATAA    | all species             | -64                                      |
| <b>CAAT box</b>          | not found      |                         |                                          |
| <b>CRE</b>               | TGACTTCA       | all species             | -64                                      |
| <b>CRE half sequence</b> | TGAC           | <i>M. cookii</i>        | -144, -174, -180, -219                   |
|                          |                | <i>M. famulus</i>       | -174, -180, -219, -223                   |
|                          |                | <i>M. macedonicus</i>   | -174, -180, -223, -861, -962             |
|                          |                | <i>M. m. bactrianus</i> | -174, -180, -223, -766                   |
|                          |                | <i>M. m. castaneus</i>  | -174, -180, -223, -766                   |
|                          |                | <i>M. m. domesticus</i> | -180, -223, -766                         |
|                          |                | <i>M. m. musculus</i>   | -174, -180, -223, -766                   |
|                          |                | <i>M. pahari</i>        | -174, -180, -219, -223, -796             |
|                          |                | <i>M. spicilegus</i>    | -174, -180, -223, -861, -962             |
|                          |                | <i>M. spretus</i>       | -174, -180, -223, -767                   |
|                          | TTCA           | <i>M. cookii</i>        | -296, -317, -322, -565, -602, -707       |
|                          |                | <i>M. famulus</i>       | -298, -317, -324, -567, -616, -711       |
|                          |                | <i>M. macedonicus</i>   | -298, -317, -324, -762, -811, -906, -977 |
|                          |                | <i>M. m. bactrianus</i> | -298, -317, -324, -615, -710, -781       |
|                          |                | <i>M. m. castaneus</i>  | -298, -317, -324, -615, -710, -781       |
|                          |                | <i>M. m. domesticus</i> | -298, -317, -324, -618, -713, -784       |
|                          |                | <i>M. m. musculus</i>   | -298, -317, -324, -615, -710, -78        |
|                          |                | <i>M. pahari</i>        | -298, -324, -567, -646, -743, -814       |
|                          |                | <i>M. spicilegus</i>    | -298, -324, -811, -906, -977             |
|                          |                | <i>M. spretus</i>       | -298, -317, -324, -567, -616, -711       |

Table S3. Analysis of transcription activation elements in the protamine 2 promoter. Position and nucleotide sequence of the most common enhance transcription elements in the protamine 2 promoter sequenced from 10 species.

| Element                  | Sequence      | Species                                                                                                                                                                                                                                  | Position                                                                                                                                                                                                                                                                                                                                                                                 |
|--------------------------|---------------|------------------------------------------------------------------------------------------------------------------------------------------------------------------------------------------------------------------------------------------|------------------------------------------------------------------------------------------------------------------------------------------------------------------------------------------------------------------------------------------------------------------------------------------------------------------------------------------------------------------------------------------|
| <b>TATA box</b>          | TATATA        | all species                                                                                                                                                                                                                              | -36                                                                                                                                                                                                                                                                                                                                                                                      |
| <b>Y-box</b>             | ACAATCAATCAGG | all species                                                                                                                                                                                                                              | -83                                                                                                                                                                                                                                                                                                                                                                                      |
| <b>Tet 1</b>             | CGCCCTCACAG   | <i>M. cookii</i><br><i>M. macedonicus</i><br><i>M. pahari</i><br><i>M. m. bactrianus</i><br><i>M. m. castaneus</i><br><i>M. m. domesticus</i><br><i>M. m. musculus</i><br><i>M. spicilegus</i><br><i>M. spretus</i>                      | -115                                                                                                                                                                                                                                                                                                                                                                                     |
|                          | TGCCCTCACAG   | <i>M. famulus</i>                                                                                                                                                                                                                        | -115                                                                                                                                                                                                                                                                                                                                                                                     |
| <b>CAAT box</b>          | CAAT          | all species                                                                                                                                                                                                                              | -78                                                                                                                                                                                                                                                                                                                                                                                      |
| <b>CRE</b>               | GGGCTGCA      | <i>M. pahari</i>                                                                                                                                                                                                                         | -184                                                                                                                                                                                                                                                                                                                                                                                     |
|                          | ATGCTTCA      | <i>M. cookii</i><br><i>M. famulus</i>                                                                                                                                                                                                    | -184                                                                                                                                                                                                                                                                                                                                                                                     |
|                          |               | <i>M. macedonicus</i><br><i>M. m. bactrianus</i><br><i>M. m. castaneus</i><br><i>M. m. domesticus</i><br><i>M. m. musculus</i><br><i>M. spicilegus</i><br><i>M. spretus</i>                                                              | -174                                                                                                                                                                                                                                                                                                                                                                                     |
| <b>CRE half sequence</b> | ATGC          | <i>M. cookii</i><br><i>M. famulus</i><br><i>M. macedonicus</i><br><i>M. m. bactrianus</i><br><i>M. m. castaneus</i><br><i>M. m. domesticus</i><br><i>M. m. musculus</i><br><i>M. pahari</i><br><i>M. spicilegus</i><br><i>M. spretus</i> | -312, -328, -404, -557<br>-272, -288, -364, -472<br>-285, -301, -357, -414, -555<br>-320, -336, -392, -518<br>-320, -335, -391, -510<br>-314, -330, -386, -488<br>-320, -335, -391, -407<br>-275, -302, -318, -407, -658, -909,<br>-1112, -1113<br>-320, -335, -488, -560<br>-320, -335, -391, -550                                                                                      |
|                          | TTCA          | <i>M. cookii</i><br><i>M. famulus</i><br><i>M. macedonicus</i><br><i>M. m. bactrianus</i><br><i>M. m. castaneus</i><br><i>M. m. domesticus</i><br><i>M. m. musculus</i><br><i>M. pahari</i><br><i>M. spicilegus</i><br><i>M. spretus</i> | -193, -210, -594, -620, -681, -951<br>-193, -229, -509, -535, -596, -878<br>-195, -208, -552, -895<br>-187, -204, -217, -555, -618, -897<br>-187, -204, -217, -547, -610, -880<br>-187, -204, -217, -525, -588, -829<br>-187, -204, -217, -555, -618, -893<br>-206, -219, -426, -610, -707, -747, -808<br>-187, -204, -217, -492, -525, -557, -798<br>-180, -204, -217, -410, -612, -866 |
